# Supplementary material for: Ethinylestradiol and Levonorgestrel as Active Agents in Normal Skin, and Pathological Conditions Induced by UVB Exposure: In Vitro and In Ovo Assessments
Source: Int J Mol Sci. 2018 Nov 14;19(11):3600. doi: 10.3390/ijms19113600 (PMC6275072; doi:10.3390/ijms19113600)
Supplement: Supplementary file 1 [file ijms-19-03600-s001.pdf]

# Ethinylestradiol and Levonorgestrel, as Active Agents in Normal Skin and Pathological Conditions Induced by UVB Exposure: In Vitro and In Ovo Assessment

Dorina Coricovac <sup>1,†</sup>, Claudia Farcas <sup>1,†</sup>, Cristian Nica <sup>2</sup>, Iulia Pinzaru <sup>1,\*</sup>, Sebastian Simu <sup>1</sup>, Dana Stoian <sup>2</sup>, Codruta Soica <sup>1</sup>, Maria Proks <sup>1</sup>, Stefana Avram <sup>1</sup>, Dan Navolan <sup>2</sup>, Catalin Dumitru <sup>2</sup>, Ramona Amina Popovici <sup>3</sup>, Cristina Adriana Dehelean <sup>1</sup>

## Supplementary Material

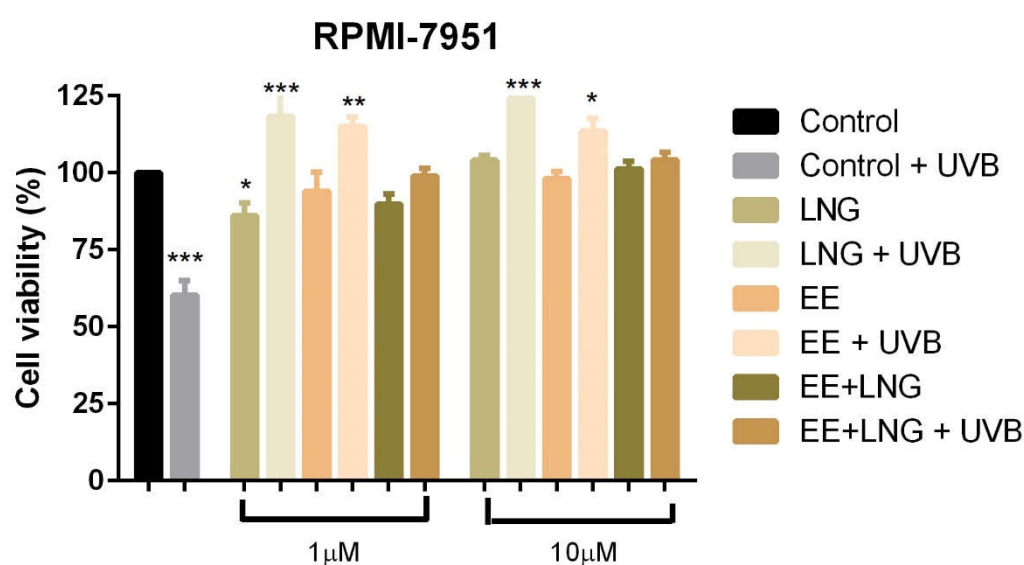

**Figure S1.** The effect of test compounds (1 and 10  $\mu$ M)  $\pm$  UVB irradiation on RPMI-7951 cells viability at 24 hr post-stimulation. The results are expressed as cell viability percentage (%) normalized to control cells. The data represent the mean values  $\pm$  SD of three independent experiments. One-way ANOVA analysis was applied to determine the statistical differences followed by Tukey's multiple comparisons test (\*  $p < 0.05$ ; \*\*  $p < 0.01$ ; \*\*\*  $p < 0.001$ , \*\*\*\*  $p < 0.0001$ ).

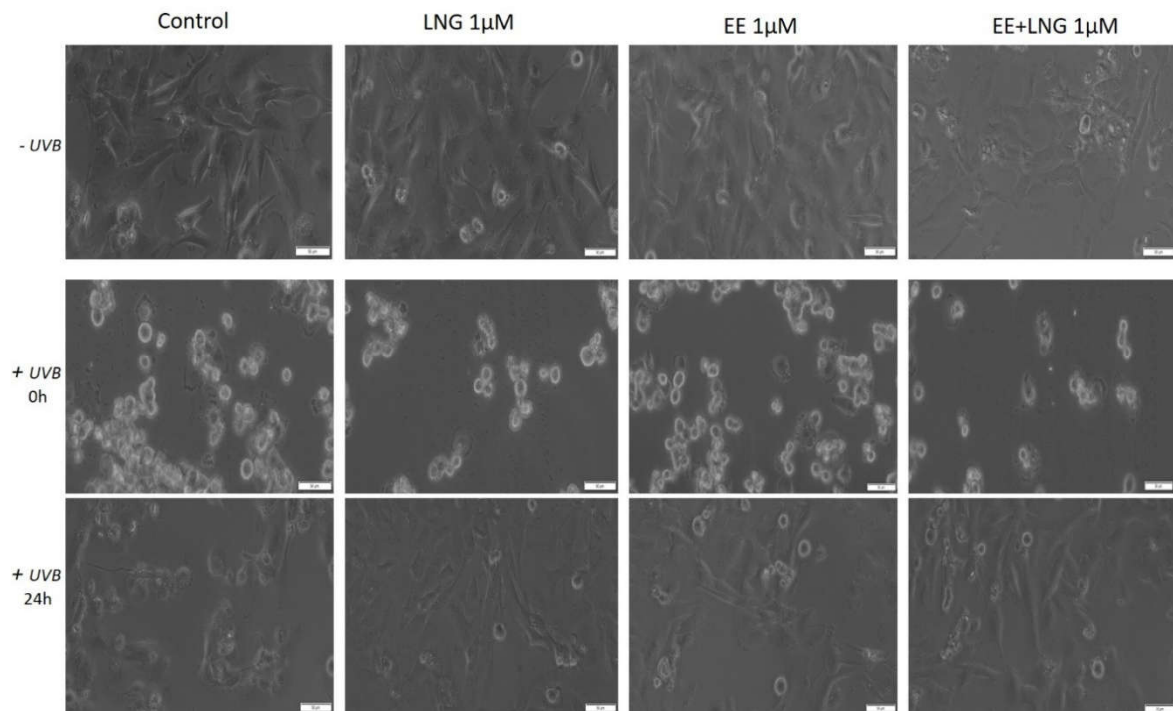

**Figure S2.** In vitro morphological aspect of human melanoma cells—RPMI-7951 cells, stimulated with levonorgestrel (LNG), ethinylestradiol (EE), and an ethinylestradiol/levonorgestrel combination (EE+LNG), respectively, at a concentration of  $1 \mu\text{M} \pm \text{UVB}$  irradiation. Scale bars represent  $50 \mu\text{m}$ .

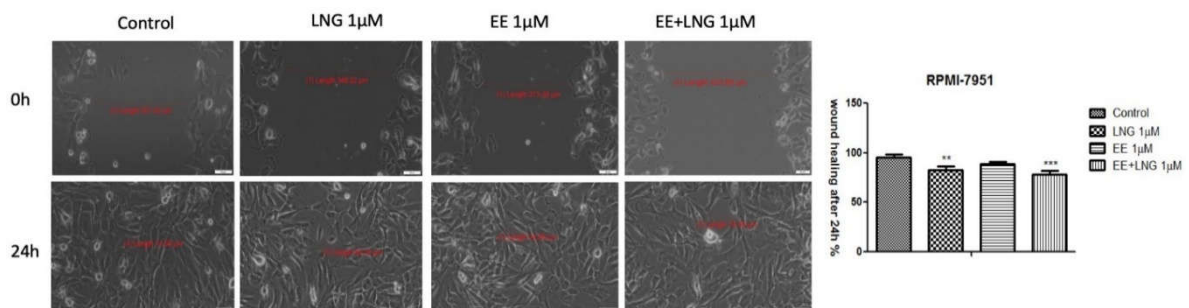

**Figure S3.** The impact of test compounds (LNG, EE, and EE+LNG –  $1 \mu\text{M}$ ) on the migratory capacity of human melanoma cells – RPMI-7951. Wound closure was recorded by bright field microscopy initially—0 hr and after 24 hr, respectively. Scale bars represent  $50 \mu\text{m}$ . The bar graphs are expressed as percentage of wound closure after 24 hr compared to the initial surface. The data represent the mean values  $\pm$  SD of three independent experiments. One-way ANOVA analysis was applied to determine the statistical differences followed by Tukey post-test (\*  $p < 0.05$ ; \*\*  $p < 0.01$ ; \*\*\*  $p < 0.001$  vs control—no stimulation).
